# Supplementary material for: The relationship between central and peripheral oxytocin concentrations: a systematic review and meta-analysis protocol
Source: Springer Nature journal article supplement (doi:10.1186/s13643-016-0225-5), 2016-03-31
Supplement: MOESM2 [file 10028310]

**Additional file 2: Risk of bias tool.** Criteria for objective assessment of risk of bias for individual studies included in the meta-analysis.

| Criteria                                                                                                                                          | Score |
|---------------------------------------------------------------------------------------------------------------------------------------------------|-------|
| <b>Category 1: Sample characteristics</b>                                                                                                         |       |
| <i><b>Human population</b></i>                                                                                                                    |       |
| 1. Presence (or absence) of study-relevant diagnosis established by trained assessor [1p], according to standardized international criteria [1p]. | /2    |
| 2. Reported comorbid diseases [1p] and medication use [1p].                                                                                       | /2    |
| <i><b>Non-human population</b></i>                                                                                                                |       |
| 3. Specified species [1p], source of individual animals stated [1p].                                                                              | /2    |
| <b>Category 2: Internal Validity</b>                                                                                                              |       |
| 4. Potential confounding variables controlled for [2p], or accounted for [1p].                                                                    | /2    |
| 5. All [2p] or most [1p] outcome measures have been validated.                                                                                    | /2    |
| <b>Category 3: Methodology and reporting</b>                                                                                                      |       |
| 6. Method of analysis stated for central [1p] and peripheral [1p] measure.                                                                        | /2    |
| 7. Outcome data is complete, or incompleteness is accounted for [2p]                                                                              | /2    |
| 8. Method of extraction described [1p].                                                                                                           | /1    |
| <b>Category 4: Paradigm-specific criteria</b>                                                                                                     |       |
| 9. IF IN-OT: Proper instructions to participants for administration of OT [1p], measure of nasal cavity health [1p].                              | /2    |

For a single study, a raw score of 11-15 is obtainable in principle. For each study, the risk of bias is expressed as a ratio of the actual raw score to its obtainable raw score. Abbreviations: OT = oxytocin, IN-OT = intranasal oxytocin.
