# Supplementary material for: The relationship between central and peripheral oxytocin concentrations: a systematic review and meta-analysis protocol
Source: Springer Nature journal article supplement (doi:10.1186/s13643-016-0225-5), 2016-03-31
Supplement: MOESM3 [file 10028310]

**Additional file 3: Data extraction form for individual studies included in meta-analysis of correlations between central and peripheral levels of oxytocin.**

| Categories                       | Values |
|----------------------------------|--------|
| <b>A Identification of study</b> |        |
| 1. Study ID                      |        |
| 2. Authors                       |        |
| 3. Title                         |        |
| 4. Year of publication           |        |
| <b>B Primary values</b>          |        |
| 1. Number of correlations        |        |
| 2. Sample size                   |        |
| 3. Effect size                   |        |
| 4. Number of samples             |        |
| <b>C Population</b>              |        |
| 1. Species                       |        |
| 2. Gender                        |        |
| 3. Mental health status          |        |
| 4. Somatic health status         |        |
| 5. Age                           |        |
| <b>D Moderators</b>              |        |
| 1. Study type                    |        |
| 2. Sampling location             |        |
| 3. Biochemical analysis          |        |
| 4. Extraction                    |        |
| 5. Level of coordination         |        |
| <b>E Other</b>                   |        |
| 1. Risk of bias                  |        |

**A1:** Assign for each study included. **B1:** Specify number of reported correlations. **B2:** For each correlation, specify sample size. **B3:** For each correlation, specify effect size and entity of correlaton. **B4:** For each correlation, specify included number of time-points for coordinated samples. **C3:** Specify mental health status of participants. **C4:** Specify somatic health status of participants. **C5:** Specify age of participants in range and/or mean and standard deviation. **D1:** Specify whether concentrations are sampled at a) baseline level, b) after exogenous OT administration, or c) after other experimental manipulations. **D2:** Specify the locations for central and peripheral samples. **D3:** Specify method for biochemical analysis of OT concentration. **D4:** Specify whether OT was extracted from the sampled substance. **D5:** Specify whether central and peripheral concentrations were sampled a) simultaneously (time interval < 2 mins), b) non-simultaneously, or c) not reported. **E1:** Report risk of bias expressed as a ratio of raw score to obtainable raw score for the study (see risk of bias form).
